# Supplementary material for: XIST-microRNAs/mRNA Network in Circulating CD4<sup>+</sup> T Cells of the Patients with Hepatocellular Carcinoma
Source: Preprints.org preprint supplement (doi:10.20944/preprints202305.1976.v1), 2023-05-29
Supplement: Supplementary file 1 [file Supplemental Table S4.xlsx]

## Sheet: miRNA target ene
Supplemental Table 4. Predicted targets of differentially expressed miRNA
Gene.Symbol	Transcript.ID	miRNA	Site.Type	context...score	context...score.percentile	weighted.context...score	weighted.context...score.percentile
ACBD3	ENST00000366812.5	hsa-miR-34a-5p	3	-0.415	97	-0.403	97
ADK	ENST00000372734.3	hsa-miR-34a-5p	2	-0.374	95	-0.374	97
ADO	ENST00000373783.1	hsa-miR-34a-5p	3	-0.377	96	-0.377	97
ALDOA	ENST00000569798.1	hsa-miR-34a-5p	3	-0.655	99	-0.653	99
AMER2	ENST00000357816.2	hsa-miR-34a-5p	3	-0.48	98	-0.355	96
ANK3	ENST00000280772.2	hsa-miR-34a-5p	1	-0.347	94	-0.347	96
AREG	ENST00000395748.3	hsa-miR-34a-5p	3	-0.62	99	-0.62	99
AREGB	ENST00000380846.3	hsa-miR-34a-5p	3	-0.659	99	-0.659	99
ARHGAP1	ENST00000311956.4	hsa-miR-34a-5p	2	-0.369	95	-0.369	96
ARHGAP26	ENST00000378004.3	hsa-miR-34a-5p	3	-0.384	96	-0.384	97
ARHGAP36	ENST00000370922.1	hsa-miR-34a-5p	3	-0.367	95	-0.367	96
ASIC2	ENST00000225823.2	hsa-miR-34a-5p	3	-0.496	98	-0.496	99
ATG4B	ENST00000405546.3	hsa-miR-34a-5p	3	-0.58	99	-0.58	99
ATMIN	ENST00000299575.4	hsa-miR-34a-5p	2	-0.409	97	-0.403	97
ATP5S	ENST00000245448.6	hsa-miR-34a-5p	2	-0.39	96	-0.39	97
AXL	ENST00000301178.4	hsa-miR-34a-5p	3	-0.512	98	-0.512	99
BCL2L13	ENST00000418951.2	hsa-miR-34a-5p	3	-0.431	97	-0.431	98
BMP3	ENST00000282701.2	hsa-miR-34a-5p	3	-0.464	98	-0.464	98
BRINP1	ENST00000265922.3	hsa-miR-34a-5p	3	-0.612	99	-0.612	99
C1QL3	ENST00000298943.3	hsa-miR-34a-5p	3	-0.371	95	-0.344	96
C3orf58	ENST00000441925.2	hsa-miR-34a-5p	3	-0.429	97	-0.429	98
C8orf37	ENST00000286688.5	hsa-miR-34a-5p	2	-0.37	95	-0.37	96
C9orf69	ENST00000561457.1	hsa-miR-34a-5p	3	-0.458	97	-0.458	98
CA7	ENST00000394069.3	hsa-miR-34a-5p	3	-0.523	98	-0.523	99
CACNB3	ENST00000301050.2	hsa-miR-34a-5p	3	-0.426	97	-0.426	98
CADM4	ENST00000222374.2	hsa-miR-34a-5p	3	-0.365	95	-0.365	96
CASP2	ENST00000310447.5	hsa-miR-34a-5p	3	-0.382	96	-0.342	96
CCDC135	ENST00000394337.4	hsa-miR-34a-5p	3	-0.38	96	-0.38	97
CCDC85A	ENST00000407595.2	hsa-miR-34a-5p	3	-0.348	94	-0.348	96
CCNE2	ENST00000520509.1	hsa-miR-34a-5p	3	-0.553	99	-0.553	99
CDIP1	ENST00000564828.1	hsa-miR-34a-5p	3	-0.461	98	-0.46	98
CELF3	ENST00000290585.4	hsa-miR-34a-5p	2	-0.353	95	-0.352	96
CERS6	ENST00000305747.6	hsa-miR-34a-5p	3	-0.362	95	-0.362	96
CHST12	ENST00000258711.6	hsa-miR-34a-5p	2	-0.406	96	-0.405	97
CORO1C	ENST00000261401.3	hsa-miR-34a-5p	3	-0.438	97	-0.438	98
CR2	ENST00000367058.3	hsa-miR-34a-5p	3	-0.431	97	-0.431	98
CTNND2	ENST00000304623.8	hsa-miR-34a-5p	2	-0.419	97	-0.419	97
CUEDC1	ENST00000577830.1	hsa-miR-34a-5p	3	-0.491	98	-0.491	98
DAAM1	ENST00000395125.1	hsa-miR-34a-5p	2	-0.344	94	-0.344	96
DCX	ENST00000356915.2	hsa-miR-34a-5p	3	-0.352	94	-0.352	96
DDX17	ENST00000396821.3	hsa-miR-34a-5p	3	-0.469	98	-0.465	98
DGKZ	ENST00000343674.6	hsa-miR-34a-5p	3	-0.503	98	-0.503	99
DHRS13	ENST00000378895.4	hsa-miR-34a-5p	3	-0.463	98	-0.463	98
DIXDC1	ENST00000440460.2	hsa-miR-34a-5p	3	-0.393	96	-0.393	97
DLL1	ENST00000366756.3	hsa-miR-34a-5p	2	-0.416	97	-0.416	97
DMWD	ENST00000377735.3	hsa-miR-34a-5p	3	-0.469	98	-0.469	98
DNAJC24	ENST00000465995.1	hsa-miR-34a-5p	3	-0.587	99	-0.475	98
DPYSL4	ENST00000338492.4	hsa-miR-34a-5p	3	-0.382	96	-0.382	97
E2F3	ENST00000346618.3	hsa-miR-34a-5p	3	-0.446	97	-0.446	98
E2F5	ENST00000418930.2	hsa-miR-34a-5p	3	-0.443	97	-0.443	98
ELMOD1	ENST00000265840.7	hsa-miR-34a-5p	2	-0.369	95	-0.369	96
EML5	ENST00000554922.1	hsa-miR-34a-5p	3	-0.363	95	-0.363	96
ERGIC1	ENST00000393784.3	hsa-miR-34a-5p	2	-0.362	95	-0.361	96
FAM167A	ENST00000284486.4	hsa-miR-34a-5p	3	-0.401	96	-0.401	97
FAM175B	ENST00000298492.5	hsa-miR-34a-5p	3	-0.538	99	-0.442	98
FAM76A	ENST00000373954.6	hsa-miR-34a-5p	3	-0.537	99	-0.537	99
FAM76A	ENST00000373954.6	hsa-miR-34a-5p	3	-0.573	99	-0.561	99
FGD6	ENST00000343958.4	hsa-miR-34a-5p	3	-0.466	98	-0.466	98
FKBP1B	ENST00000380991.4	hsa-miR-34a-5p	2	-0.481	98	-0.468	98
FLOT2	ENST00000394906.2	hsa-miR-34a-5p	3	-0.498	98	-0.498	99
FOSL1	ENST00000532401.1	hsa-miR-34a-5p	3	-0.446	97	-0.437	98
FOXP1	ENST00000318789.4	hsa-miR-34a-5p	2	-0.408	96	-0.408	97
FUT11	ENST00000394790.1	hsa-miR-34a-5p	3	-0.35	94	-0.35	96
FUT8	ENST00000360689.5	hsa-miR-34a-5p	3	-0.544	99	-0.544	99
FXYD2	ENST00000528014.1	hsa-miR-34a-5p	3	-0.664	99	-0.664	99
GABRA3	ENST00000370314.4	hsa-miR-34a-5p	3	-0.51	98	-0.51	99
GAS1	ENST00000298743.7	hsa-miR-34a-5p	3	-0.525	99	-0.523	99
GCH1	ENST00000491895.2	hsa-miR-34a-5p	3	-0.375	95	-0.355	96
GK5	ENST00000392993.2	hsa-miR-34a-5p	2	-0.361	95	-0.361	96
GMNC	ENST00000442080.1	hsa-miR-34a-5p	3	-0.617	99	-0.617	99
GNAO1	ENST00000262493.6	hsa-miR-34a-5p	3	-0.562	99	-0.562	99
GPR158	ENST00000376351.3	hsa-miR-34a-5p	2	-0.367	95	-0.367	96
GPR22	ENST00000304402.4	hsa-miR-34a-5p	1	-0.356	95	-0.356	96
GREM2	ENST00000318160.4	hsa-miR-34a-5p	3	-0.454	97	-0.444	98
HCN3	ENST00000368358.3	hsa-miR-34a-5p	3	-0.426	97	-0.426	98
HNRNPA1	ENST00000546500.1	hsa-miR-34a-5p	3	-0.422	97	-0.406	97
HOXA13	ENST00000222753.4	hsa-miR-34a-5p	3	-0.503	98	-0.478	98
HSPA1B	ENST00000375650.3	hsa-miR-34a-5p	3	-0.617	99	-0.554	99
HTR2C	ENST00000371950.3	hsa-miR-34a-5p	3	-0.452	97	-0.452	98
IGSF1	ENST00000370900.1	hsa-miR-34a-5p	3	-0.373	95	-0.373	97
INA	ENST00000369849.4	hsa-miR-34a-5p	3	-0.483	98	-0.438	98
KIAA1462	ENST00000375377.1	hsa-miR-34a-5p	3	-0.367	95	-0.367	96
KLF4	ENST00000374672.4	hsa-miR-34a-5p	3	-0.508	98	-0.508	99
LDHA	ENST00000227157.4	hsa-miR-34a-5p	3	-0.462	98	-0.452	98
LEF1	ENST00000265165.1	hsa-miR-34a-5p	3	-0.571	99	-0.571	99
LGI1	ENST00000371413.3	hsa-miR-34a-5p	1	-0.361	95	-0.361	96
LGR4	ENST00000379214.4	hsa-miR-34a-5p	3	-0.402	96	-0.402	97
LIMD2	ENST00000259006.3	hsa-miR-34a-5p	3	-0.544	99	-0.544	99
LINC00998	ENST00000397764.3	hsa-miR-34a-5p	2	-0.476	98	-0.476	98
LMAN1	ENST00000251047.5	hsa-miR-34a-5p	3	-0.406	96	-0.35	96
LMAN2L	ENST00000264963.4	hsa-miR-34a-5p	2	-0.393	96	-0.365	96
LMBR1L	ENST00000267102.8	hsa-miR-34a-5p	3	-0.65	99	-0.65	99
LRRC40	ENST00000370952.3	hsa-miR-34a-5p	3	-0.579	99	-0.579	99
LYPLAL1	ENST00000366928.5	hsa-miR-34a-5p	1	-0.37	95	-0.37	96
MAP2K1	ENST00000307102.5	hsa-miR-34a-5p	3	-0.497	98	-0.497	99
MAP3K7CL	ENST00000286791.5	hsa-miR-34a-5p	3	-0.471	98	-0.471	98
MDM4	ENST00000391947.2	hsa-miR-34a-5p	3	-0.465	98	-0.465	98
MDM4	ENST00000391947.2	hsa-miR-34a-5p	3	-0.486	98	-0.459	98
MDM4	ENST00000391947.2	hsa-miR-34a-5p	3	-0.385	96	-0.352	96
METAP1	ENST00000296411.6	hsa-miR-34a-5p	2	-0.368	95	-0.368	96
MTA2	ENST00000278823.2	hsa-miR-34a-5p	3	-0.344	94	-0.344	96
MYCN	ENST00000281043.3	hsa-miR-34a-5p	3	-0.553	99	-0.553	99
MYCN	ENST00000281043.3	hsa-miR-34a-5p	2	-0.404	96	-0.404	97
NETO1	ENST00000327305.6	hsa-miR-34a-5p	2	-0.421	97	-0.42	97
NOS1AP	ENST00000361897.5	hsa-miR-34a-5p	3	-0.355	95	-0.355	96
NOTCH1	ENST00000277541.6	hsa-miR-34a-5p	2	-0.467	98	-0.467	98
NR4A2	ENST00000409108.2	hsa-miR-34a-5p	2	-0.365	95	-0.355	96
NRIP3	ENST00000309166.3	hsa-miR-34a-5p	3	-0.539	99	-0.539	99
NUMBL	ENST00000252891.4	hsa-miR-34a-5p	3	-0.441	97	-0.441	98
ORMDL3	ENST00000304046.2	hsa-miR-34a-5p	3	-0.391	96	-0.391	97
OSGIN2	ENST00000451899.2	hsa-miR-34a-5p	3	-0.449	97	-0.427	98
PARD6B	ENST00000371610.2	hsa-miR-34a-5p	2	-0.349	94	-0.341	96
PDGFRA	ENST00000257290.5	hsa-miR-34a-5p	2	-0.359	95	-0.359	96
PEA15	ENST00000360472.4	hsa-miR-34a-5p	3	-0.539	99	-0.459	98
PGM1	ENST00000371084.3	hsa-miR-34a-5p	3	-0.346	94	-0.346	96
PKIA	ENST00000396418.2	hsa-miR-34a-5p	2	-0.364	95	-0.364	96
PLA2G15	ENST00000566188.1	hsa-miR-34a-5p	3	-0.35	94	-0.349	96
PLAG1	ENST00000316981.3	hsa-miR-34a-5p	3	-0.494	98	-0.494	99
PNOC	ENST00000301908.3	hsa-miR-34a-5p	3	-0.7	99	-0.7	99
POGZ	ENST00000392723.1	hsa-miR-34a-5p	3	-0.51	98	-0.43	98
POMGNT1	ENST00000396420.3	hsa-miR-34a-5p	3	-0.351	94	-0.351	96
PPP2R3A	ENST00000264977.3	hsa-miR-34a-5p	3	-0.361	95	-0.361	96
PREB	ENST00000260643.2	hsa-miR-34a-5p	3	-0.493	98	-0.493	98
RAE1	ENST00000395841.2	hsa-miR-34a-5p	2	-0.39	96	-0.39	97
RALGDS	ENST00000372050.3	hsa-miR-34a-5p	3	-0.355	95	-0.355	96
RCAN1	ENST00000482533.1	hsa-miR-34a-5p	3	-0.567	99	-0.567	99
RGS17	ENST00000367225.2	hsa-miR-34a-5p	3	-0.414	97	-0.414	97
RIC8B	ENST00000392837.4	hsa-miR-34a-5p	2	-0.421	97	-0.421	97
RRAGC	ENST00000373001.3	hsa-miR-34a-5p	2	-0.418	97	-0.418	97
RRAS	ENST00000246792.3	hsa-miR-34a-5p	3	-0.939	99	-0.939	99
RTN4RL1	ENST00000331238.6	hsa-miR-34a-5p	3	-0.508	98	-0.508	99
SATB2	ENST00000417098.1	hsa-miR-34a-5p	3	-0.438	97	-0.388	97
SCN2B	ENST00000278947.5	hsa-miR-34a-5p	3	-0.444	97	-0.444	98
SCN2B	ENST00000278947.5	hsa-miR-34a-5p	3	-0.377	96	-0.377	97
SERPINF2	ENST00000382061.4	hsa-miR-34a-5p	3	-0.525	99	-0.523	99
SGPP1	ENST00000247225.6	hsa-miR-34a-5p	3	-0.453	97	-0.453	98
SIDT1	ENST00000264852.4	hsa-miR-34a-5p	3	-0.413	97	-0.413	97
SLC30A3	ENST00000233535.4	hsa-miR-34a-5p	3	-0.546	99	-0.546	99
SMIM15	ENST00000339020.3	hsa-miR-34a-5p	3	-0.693	99	-0.676	99
SNTB2	ENST00000336278.4	hsa-miR-34a-5p	3	-0.408	96	-0.401	97
SNX15	ENST00000377244.3	hsa-miR-34a-5p	3	-0.396	96	-0.396	97
SPRN	ENST00000414069.2	hsa-miR-34a-5p	3	-0.371	95	-0.371	97
STRN3	ENST00000355683.5	hsa-miR-34a-5p	3	-0.435	97	-0.435	98
STX1A	ENST00000395156.3	hsa-miR-34a-5p	3	-0.348	94	-0.348	96
SVIP	ENST00000354193.4	hsa-miR-34a-5p	1	-0.361	95	-0.361	96
SYT1	ENST00000457153.2	hsa-miR-34a-5p	3	-0.388	96	-0.388	97
TGIF2	ENST00000373874.2	hsa-miR-34a-5p	3	-0.489	98	-0.489	98
TMED8	ENST00000216468.7	hsa-miR-34a-5p	3	-0.406	96	-0.406	97
TMEM109	ENST00000227525.3	hsa-miR-34a-5p	2	-0.345	94	-0.345	96
TMEM126B	ENST00000534341.1	hsa-miR-34a-5p	3	-0.46	98	-0.46	98
TMEM246	ENST00000374847.1	hsa-miR-34a-5p	2	-0.344	94	-0.344	96
TMEM52B	ENST00000298530.3	hsa-miR-34a-5p	3	-0.353	95	-0.353	96
TMUB2	ENST00000590235.1	hsa-miR-34a-5p	3	-0.551	99	-0.551	99
TPD52	ENST00000379096.5	hsa-miR-34a-5p	3	-0.538	99	-0.538	99
TSN	ENST00000536142.1	hsa-miR-34a-5p	3	-0.571	99	-0.349	96
TTC19	ENST00000261647.5	hsa-miR-34a-5p	3	-0.517	98	-0.517	99
UBP1	ENST00000283629.3	hsa-miR-34a-5p	3	-0.43	97	-0.43	98
UHRF2	ENST00000276893.5	hsa-miR-34a-5p	2	-0.364	95	-0.364	96
USF1	ENST00000368020.1	hsa-miR-34a-5p	2	-0.361	95	-0.361	96
VAMP2	ENST00000404970.3	hsa-miR-34a-5p	3	-0.524	99	-0.514	99
VAT1	ENST00000355653.3	hsa-miR-34a-5p	3	-0.487	98	-0.487	98
VPS37B	ENST00000267202.2	hsa-miR-34a-5p	3	-0.42	97	-0.419	97
WASF1	ENST00000392587.2	hsa-miR-34a-5p	2	-0.422	97	-0.422	98
ZCCHC17	ENST00000344147.5	hsa-miR-34a-5p	3	-0.484	98	-0.484	98
ZDHHC16	ENST00000345745.5	hsa-miR-34a-5p	3	-0.582	99	-0.582	99
ZDHHC17	ENST00000426126.2	hsa-miR-34a-5p	3	-0.449	97	-0.449	98
ZMYM4	ENST00000314607.6	hsa-miR-34a-5p	3	-0.36	95	-0.346	96
ZNF281	ENST00000294740.3	hsa-miR-34a-5p	3	-0.537	99	-0.537	99
ADAM10	ENST00000260408.3	hsa-miR-369-3p	3	-0.181	97	-0.178	98
ANXA4	ENST00000394295.4	hsa-miR-369-3p	2	-0.116	94	-0.109	96
APOPT1	ENST00000556253.2	hsa-miR-369-3p	3	-0.449	99	-0.449	99
ARHGEF26	ENST00000356448.4	hsa-miR-369-3p	2	-0.111	94	-0.109	96
ARID2	ENST00000457135.1	hsa-miR-369-3p	3	-0.158	97	-0.158	97
ARL2BP	ENST00000219204.3	hsa-miR-369-3p	3	-0.314	99	-0.302	99
ATF2	ENST00000487334.2	hsa-miR-369-3p	3	-0.158	97	-0.139	97
ATMIN	ENST00000299575.4	hsa-miR-369-3p	3	-0.135	96	-0.135	97
B3GNT1	ENST00000311181.4	hsa-miR-369-3p	2	-0.153	96	-0.122	96
BIRC3	ENST00000532808.1	hsa-miR-369-3p	3	-0.25	99	-0.25	99
C11orf58	ENST00000228136.4	hsa-miR-369-3p	3	-0.306	99	-0.306	99
CAPZA2	ENST00000361183.3	hsa-miR-369-3p	3	-0.252	99	-0.248	99
CBX4	ENST00000269397.4	hsa-miR-369-3p	3	-0.226	98	-0.226	99
CCNE2	ENST00000520509.1	hsa-miR-369-3p	3	-0.294	99	-0.277	99
CCNG2	ENST00000316355.5	hsa-miR-369-3p	2	-0.158	97	-0.158	97
CCNG2	ENST00000316355.5	hsa-miR-369-3p	3	-0.146	96	-0.142	97
CD2AP	ENST00000359314.5	hsa-miR-369-3p	2	-0.121	95	-0.121	96
CDH20	ENST00000262717.4	hsa-miR-369-3p	3	-0.163	97	-0.163	98
CEBPA	ENST00000498907.2	hsa-miR-369-3p	3	-0.279	99	-0.271	99
CEBPB	ENST00000303004.3	hsa-miR-369-3p	3	-0.395	99	-0.393	99
CFL2	ENST00000341223.3	hsa-miR-369-3p	2	-0.229	98	-0.229	99
CHIC2	ENST00000263921.3	hsa-miR-369-3p	2	-0.249	99	-0.248	99
CLIC4	ENST00000374379.4	hsa-miR-369-3p	2	-0.161	97	-0.161	97
CNBP	ENST00000502976.1	hsa-miR-369-3p	2	-0.217	98	-0.217	99
CNOT8	ENST00000285896.6	hsa-miR-369-3p	3	-0.218	98	-0.18	98
COQ10B	ENST00000263960.2	hsa-miR-369-3p	3	-0.248	99	-0.248	99
CRK	ENST00000398970.5	hsa-miR-369-3p	3	-0.204	98	-0.189	98
CRTAP	ENST00000320954.6	hsa-miR-369-3p	2	-0.14	96	-0.14	97
DCTN6	ENST00000221114.3	hsa-miR-369-3p	2	-0.273	99	-0.273	99
DENND4A	ENST00000443035.3	hsa-miR-369-3p	3	-0.174	97	-0.137	97
DESI1	ENST00000263256.6	hsa-miR-369-3p	3	-0.316	99	-0.285	99
DNAJB5	ENST00000545841.1	hsa-miR-369-3p	2	-0.112	94	-0.112	96
DR1	ENST00000370272.4	hsa-miR-369-3p	3	-0.174	97	-0.135	97
EFNA5	ENST00000333274.6	hsa-miR-369-3p	2	-0.132	95	-0.131	96
EGR2	ENST00000242480.3	hsa-miR-369-3p	3	-0.143	96	-0.143	97
ELOVL7	ENST00000508821.1	hsa-miR-369-3p	3	-0.203	98	-0.203	98
EPS8L2	ENST00000318562.8	hsa-miR-369-3p	2	-0.14	96	-0.14	97
EYA1	ENST00000388742.4	hsa-miR-369-3p	3	-0.246	99	-0.246	99
FAM107B	ENST00000378470.1	hsa-miR-369-3p	2	-0.171	97	-0.146	97
FAM135A	ENST00000418814.2	hsa-miR-369-3p	3	-0.23	98	-0.23	99
FAM19A2	ENST00000416284.3	hsa-miR-369-3p	3	-0.223	98	-0.14	97
FBXL3	ENST00000355619.5	hsa-miR-369-3p	3	-0.299	99	-0.299	99
FEZF1	ENST00000442488.2	hsa-miR-369-3p	3	-0.194	98	-0.194	98
FLJ20373	ENST00000414004.2	hsa-miR-369-3p	2	-0.15	96	-0.147	97
FYN	ENST00000368682.3	hsa-miR-369-3p	2	-0.202	98	-0.202	98
GFRA2	ENST00000524240.1	hsa-miR-369-3p	2	-0.116	94	-0.116	96
GIT2	ENST00000355312.3	hsa-miR-369-3p	2	-0.154	97	-0.154	97
GPR50	ENST00000218316.3	hsa-miR-369-3p	3	-0.158	97	-0.152	97
H3F3B	ENST00000591890.1	hsa-miR-369-3p	3	-0.288	99	-0.231	99
HAO1	ENST00000378789.3	hsa-miR-369-3p	2	-0.235	98	-0.235	99
HES1	ENST00000232424.3	hsa-miR-369-3p	3	-0.343	99	-0.343	99
HOMER1	ENST00000508576.1	hsa-miR-369-3p	3	-0.188	98	-0.163	98
HOXB3	ENST00000470495.1	hsa-miR-369-3p	2	-0.162	97	-0.162	98
HSPE1-MOB4	ENST00000604458.1	hsa-miR-369-3p	2	-0.127	95	-0.122	96
HSPH1	ENST00000320027.5	hsa-miR-369-3p	3	-0.249	99	-0.245	99
IKBKB	ENST00000379708.3	hsa-miR-369-3p	2	-0.117	95	-0.116	96
IL7R	ENST00000343305.4	hsa-miR-369-3p	3	-0.133	95	-0.128	96
INHBB	ENST00000295228.3	hsa-miR-369-3p	3	-0.114	94	-0.114	96
KIAA1468	ENST00000398130.2	hsa-miR-369-3p	3	-0.11	94	-0.11	96
KIF20A	ENST00000394894.3	hsa-miR-369-3p	3	-0.309	99	-0.309	99
KLF7	ENST00000423015.1	hsa-miR-369-3p	3	-0.123	95	-0.121	96
KTN1	ENST00000416613.1	hsa-miR-369-3p	3	-0.243	99	-0.243	99
LIMK1	ENST00000418310.1	hsa-miR-369-3p	2	-0.122	95	-0.122	96
MCFD2	ENST00000444761.2	hsa-miR-369-3p	3	-0.256	99	-0.222	99
MGAT3	ENST00000341184.6	hsa-miR-369-3p	2	-0.163	97	-0.163	98
MOB4	ENST00000233892.4	hsa-miR-369-3p	2	-0.139	96	-0.139	97
MYLK4	ENST00000268446.5	hsa-miR-369-3p	3	-0.153	96	-0.153	97
NOG	ENST00000332822.4	hsa-miR-369-3p	3	-0.275	99	-0.275	99
NPY1R	ENST00000296533.2	hsa-miR-369-3p	3	-0.243	99	-0.243	99
NR2F2	ENST00000394166.3	hsa-miR-369-3p	3	-0.232	98	-0.216	99
NUMBL	ENST00000252891.4	hsa-miR-369-3p	3	-0.143	96	-0.143	97
OCIAD1	ENST00000396448.2	hsa-miR-369-3p	3	-0.205	98	-0.205	98
PAX6	ENST00000419022.1	hsa-miR-369-3p	2	-0.155	97	-0.155	97
PAXIP1	ENST00000404141.1	hsa-miR-369-3p	3	-0.225	98	-0.225	99
PDE8B	ENST00000264917.5	hsa-miR-369-3p	3	-0.119	95	-0.119	96
PHACTR3	ENST00000359926.3	hsa-miR-369-3p	3	-0.279	99	-0.279	99
PNRC1	ENST00000336032.3	hsa-miR-369-3p	3	-0.38	99	-0.38	99
PNRC1	ENST00000336032.3	hsa-miR-369-3p	2	-0.171	97	-0.17	98
POP1	ENST00000401707.2	hsa-miR-369-3p	2	-0.12	95	-0.12	96
PRKAB2	ENST00000254101.3	hsa-miR-369-3p	3	-0.231	98	-0.19	98
PTPN12	ENST00000248594.6	hsa-miR-369-3p	2	-0.123	95	-0.123	96
RAB10	ENST00000264710.4	hsa-miR-369-3p	3	-0.268	99	-0.266	99
RANBP9	ENST00000011619.3	hsa-miR-369-3p	3	-0.209	98	-0.209	98
RASA2	ENST00000286364.3	hsa-miR-369-3p	3	-0.17	97	-0.17	98
RASSF8	ENST00000541490.1	hsa-miR-369-3p	3	-0.196	98	-0.193	98
RBFOX3	ENST00000583458.1	hsa-miR-369-3p	2	-0.187	98	-0.187	98
RCAN1	ENST00000482533.1	hsa-miR-369-3p	3	-0.228	98	-0.228	99
RFX4	ENST00000229387.5	hsa-miR-369-3p	3	-0.126	95	-0.126	96
RGS7BP	ENST00000334025.2	hsa-miR-369-3p	3	-0.154	97	-0.154	97
RNF11	ENST00000242719.3	hsa-miR-369-3p	2	-0.137	96	-0.137	97
RNF13	ENST00000392894.3	hsa-miR-369-3p	2	-0.133	95	-0.133	97
SCOC	ENST00000608372.1	hsa-miR-369-3p	2	-0.112	94	-0.112	96
SEC23A	ENST00000537403.1	hsa-miR-369-3p	3	-0.231	98	-0.212	98
SETD2	ENST00000409792.3	hsa-miR-369-3p	3	-0.132	95	-0.132	96
SLC35F5	ENST00000245680.2	hsa-miR-369-3p	2	-0.142	96	-0.128	96
SLC35F5	ENST00000245680.2	hsa-miR-369-3p	2	-0.158	97	-0.109	96
SMARCA1	ENST00000371121.3	hsa-miR-369-3p	2	-0.153	96	-0.153	97
SPAG7	ENST00000575142.1	hsa-miR-369-3p	2	-0.18	97	-0.18	98
TCAIM	ENST00000342649.4	hsa-miR-369-3p	2	-0.138	96	-0.138	97
TLE4	ENST00000376544.3	hsa-miR-369-3p	3	-0.229	98	-0.229	99
TLX3	ENST00000296921.5	hsa-miR-369-3p	3	-0.119	95	-0.119	96
TMEFF2	ENST00000392314.1	hsa-miR-369-3p	3	-0.312	99	-0.312	99
TRAPPC8	ENST00000283351.4	hsa-miR-369-3p	3	-0.285	99	-0.282	99
UBE2E2	ENST00000396703.1	hsa-miR-369-3p	2	-0.214	98	-0.202	98
UCHL3	ENST00000377595.3	hsa-miR-369-3p	2	-0.324	99	-0.324	99
UGCG	ENST00000374279.3	hsa-miR-369-3p	3	-0.17	97	-0.17	98
VEGFC	ENST00000280193.2	hsa-miR-369-3p	3	-0.305	99	-0.305	99
VSNL1	ENST00000406397.1	hsa-miR-369-3p	2	-0.121	95	-0.121	96
WDR20	ENST00000335263.5	hsa-miR-369-3p	3	-0.245	99	-0.213	99
WRN	ENST00000298139.5	hsa-miR-369-3p	3	-0.122	95	-0.122	96
XKR8	ENST00000373884.5	hsa-miR-369-3p	2	-0.178	97	-0.178	98
YAF2	ENST00000327791.4	hsa-miR-369-3p	2	-0.153	96	-0.135	97
ZCCHC11	ENST00000257177.4	hsa-miR-369-3p	2	-0.108	94	-0.108	96
ZFAND4	ENST00000344646.5	hsa-miR-369-3p	3	-0.166	97	-0.166	98
ZFAND6	ENST00000261749.6	hsa-miR-369-3p	2	-0.166	97	-0.166	98
ZNF281	ENST00000294740.3	hsa-miR-369-3p	2	-0.113	94	-0.113	96
ZNF423	ENST00000561648.1	hsa-miR-369-3p	3	-0.177	97	-0.164	98
ZNF521	ENST00000361524.3	hsa-miR-369-3p	2	-0.133	95	-0.133	97
ZNF771	ENST00000319296.5	hsa-miR-369-3p	3	-0.399	99	-0.399	99
C5orf51	ENST00000381647.2	hsa-miR-379-5p	2	-0.27	94	-0.27	96
CDKN2AIP	ENST00000302350.4	hsa-miR-379-5p	3	-0.605	99	-0.605	99
DNAJC30	ENST00000395176.2	hsa-miR-379-5p	2	-0.427	98	-0.427	99
EDN1	ENST00000379375.5	hsa-miR-379-5p	2	-0.31	96	-0.31	97
EHD4	ENST00000220325.4	hsa-miR-379-5p	3	-0.371	97	-0.371	98
EI24	ENST00000343678.4	hsa-miR-379-5p	2	-0.289	95	-0.289	96
EIF4G2	ENST00000526148.1	hsa-miR-379-5p	3	-0.553	99	-0.553	99
FAM222B	ENST00000582266.1	hsa-miR-379-5p	2	-0.36	97	-0.36	98
HOMER2	ENST00000450735.2	hsa-miR-379-5p	2	-0.319	96	-0.319	97
KCNJ1	ENST00000392665.2	hsa-miR-379-5p	3	-0.396	98	-0.396	98
LIN28B	ENST00000345080.4	hsa-miR-379-5p	2	-0.271	94	-0.271	96
MTMR2	ENST00000346299.5	hsa-miR-379-5p	3	-0.476	99	-0.373	98
PCGF3	ENST00000362003.5	hsa-miR-379-5p	2	-0.309	96	-0.266	96
PCGF5	ENST00000336126.5	hsa-miR-379-5p	3	-0.338	96	-0.298	97
PXT1	ENST00000454782.2	hsa-miR-379-5p	2	-0.426	98	-0.426	99
RAB30	ENST00000533486.1	hsa-miR-379-5p	3	-0.402	98	-0.402	99
RTN4RL2	ENST00000335099.3	hsa-miR-379-5p	2	-0.294	95	-0.294	97
SLC20A1	ENST00000272542.3	hsa-miR-379-5p	2	-0.321	96	-0.288	96
TGFBR1	ENST00000374994.4	hsa-miR-379-5p	2	-0.325	96	-0.319	97
UBE2E3	ENST00000410062.4	hsa-miR-379-5p	3	-0.539	99	-0.539	99
YARS	ENST00000373477.4	hsa-miR-379-5p	3	-0.302	95	-0.293	97
ZBTB26	ENST00000373656.3	hsa-miR-379-5p	2	-0.376	97	-0.376	98
AC137932.1	ENST00000602042.1	hsa-miR-493-3p	3	-0.271	95	-0.271	96
AC174470.1	ENST00000457257.1	hsa-miR-493-3p	3	-0.314	97	-0.314	97
ACAA2	ENST00000285093.10	hsa-miR-493-3p	3	-0.464	99	-0.464	99
ANKRD29	ENST00000592179.1	hsa-miR-493-3p	3	-0.412	98	-0.412	99
APEX1	ENST00000557054.1	hsa-miR-493-3p	2	-0.456	99	-0.456	99
APITD1-CORT	ENST00000470413.2	hsa-miR-493-3p	2	-0.373	98	-0.373	98
C14orf1	ENST00000256319.6	hsa-miR-493-3p	2	-0.338	97	-0.335	98
C1RL	ENST00000544702.1	hsa-miR-493-3p	3	-0.439	99	-0.32	97
CDC27	ENST00000066544.3	hsa-miR-493-3p	3	-0.386	98	-0.375	98
CFL1	ENST00000525451.2	hsa-miR-493-3p	2	-0.348	98	-0.303	97
CIAO1	ENST00000488633.1	hsa-miR-493-3p	3	-0.517	99	-0.517	99
CIC	ENST00000575354.2	hsa-miR-493-3p	3	-0.263	95	-0.263	96
DMRT2	ENST00000259622.6	hsa-miR-493-3p	3	-0.266	95	-0.266	96
DPY30	ENST00000342166.5	hsa-miR-493-3p	3	-0.857	99	-0.823	99
DYNLRB1	ENST00000357156.2	hsa-miR-493-3p	3	-0.642	99	-0.639	99
EIF4A1	ENST00000582746.1	hsa-miR-493-3p	2	-0.368	98	-0.368	98
FAM102B	ENST00000370035.3	hsa-miR-493-3p	3	-0.346	98	-0.293	97
FAM219B	ENST00000357635.5	hsa-miR-493-3p	3	-0.318	97	-0.292	97
FOXP2	ENST00000408937.3	hsa-miR-493-3p	3	-0.315	97	-0.315	97
GNG2	ENST00000556752.1	hsa-miR-493-3p	2	-0.289	96	-0.262	96
H2AFY	ENST00000511689.1	hsa-miR-493-3p	2	-0.38	98	-0.38	98
ITPRIPL1	ENST00000536814.1	hsa-miR-493-3p	3	-0.284	96	-0.272	96
KCNJ9	ENST00000368088.3	hsa-miR-493-3p	3	-0.284	96	-0.284	97
KCNMB1	ENST00000274629.4	hsa-miR-493-3p	3	-0.342	98	-0.342	98
KIF3B	ENST00000375712.3	hsa-miR-493-3p	2	-0.265	95	-0.265	96
LIAS	ENST00000340169.2	hsa-miR-493-3p	3	-0.77	99	-0.77	99
LPXN	ENST00000395074.2	hsa-miR-493-3p	2	-0.311	96	-0.311	97
MAP1LC3B	ENST00000268607.5	hsa-miR-493-3p	3	-0.671	99	-0.671	99
MARCH6	ENST00000274140.5	hsa-miR-493-3p	2	-0.335	97	-0.335	98
MRVI1	ENST00000421747.1	hsa-miR-493-3p	3	-0.263	95	-0.263	96
NIF3L1	ENST00000409588.1	hsa-miR-493-3p	2	-0.327	97	-0.327	98
PEA15	ENST00000360472.4	hsa-miR-493-3p	3	-0.326	97	-0.326	98
RND2	ENST00000544533.1	hsa-miR-493-3p	2	-0.356	98	-0.356	98
RNF207	ENST00000377948.2	hsa-miR-493-3p	2	-0.261	94	-0.261	96
RTBDN	ENST00000589272.1	hsa-miR-493-3p	2	-0.259	94	-0.259	96
SLC29A2	ENST00000311161.7	hsa-miR-493-3p	2	-0.269	95	-0.269	96
SMTNL2	ENST00000338859.4	hsa-miR-493-3p	3	-0.39	98	-0.361	98
SOSTDC1	ENST00000307068.4	hsa-miR-493-3p	3	-0.48	99	-0.48	99
SRSF11	ENST00000370950.3	hsa-miR-493-3p	3	-0.465	99	-0.465	99
ST13	ENST00000216218.3	hsa-miR-493-3p	2	-0.271	95	-0.271	96
TANGO2	ENST00000434570.2	hsa-miR-493-3p	3	-0.337	97	-0.337	98
YTHDF2	ENST00000373812.3	hsa-miR-493-3p	3	-0.529	99	-0.529	99
AAR2	ENST00000320849.4	hsa-miR-493-5p	2	-0.26	97	-0.245	97
AC012360.2	ENST00000595531.1	hsa-miR-493-5p	3	-0.531	99	-0.44	99
ACTR10	ENST00000254286.4	hsa-miR-493-5p	1	-0.192	94	-0.192	96
ACTR1B	ENST00000289228.5	hsa-miR-493-5p	3	-0.354	98	-0.354	99
AHDC1	ENST00000247087.5	hsa-miR-493-5p	3	-0.339	98	-0.339	99
AKAP6	ENST00000557272.1	hsa-miR-493-5p	3	-0.21	95	-0.21	96
ANKRD17	ENST00000358602.4	hsa-miR-493-5p	3	-0.294	98	-0.294	98
ANKRD61	ENST00000409061.1	hsa-miR-493-5p	3	-0.507	99	-0.507	99
AP3S1	ENST00000316788.7	hsa-miR-493-5p	3	-0.447	99	-0.447	99
APBB1IP	ENST00000376236.4	hsa-miR-493-5p	2	-0.223	95	-0.223	97
APOO	ENST00000379226.4	hsa-miR-493-5p	3	-0.493	99	-0.492	99
ARID1B	ENST00000346085.5	hsa-miR-493-5p	3	-0.428	99	-0.356	99
ARID1B	ENST00000346085.5	hsa-miR-493-5p	2	-0.252	97	-0.212	96
ATP5A1	ENST00000282050.2	hsa-miR-493-5p	2	-0.219	95	-0.219	97
ATP5B	ENST00000262030.3	hsa-miR-493-5p	2	-0.277	97	-0.248	97
BASP1	ENST00000322611.3	hsa-miR-493-5p	3	-0.468	99	-0.44	99
BCL7A	ENST00000538010.1	hsa-miR-493-5p	3	-0.258	97	-0.199	96
BCOR	ENST00000397354.3	hsa-miR-493-5p	2	-0.199	94	-0.199	96
BRD7	ENST00000394688.3	hsa-miR-493-5p	2	-0.31	98	-0.31	98
BRINP1	ENST00000265922.3	hsa-miR-493-5p	3	-0.347	98	-0.347	99
BTG1	ENST00000256015.3	hsa-miR-493-5p	2	-0.212	95	-0.211	96
C4orf46	ENST00000508457.1	hsa-miR-493-5p	2	-0.279	97	-0.279	98
CACNB2	ENST00000396576.2	hsa-miR-493-5p	3	-0.208	95	-0.208	96
CAMK2N1	ENST00000375078.3	hsa-miR-493-5p	3	-0.355	98	-0.353	99
CAMK2N1	ENST00000375078.3	hsa-miR-493-5p	3	-0.459	99	-0.454	99
CARTPT	ENST00000296777.4	hsa-miR-493-5p	3	-0.552	99	-0.552	99
CCNG2	ENST00000316355.5	hsa-miR-493-5p	2	-0.225	95	-0.218	97
CHRM2	ENST00000445907.2	hsa-miR-493-5p	3	-0.303	98	-0.303	98
CKS2	ENST00000314355.6	hsa-miR-493-5p	3	-0.608	99	-0.608	99
CPLX2	ENST00000359546.4	hsa-miR-493-5p	3	-0.271	97	-0.271	98
CPSF1	ENST00000349769.3	hsa-miR-493-5p	1	-0.217	95	-0.217	97
CSPP1	ENST00000262210.5	hsa-miR-493-5p	2	-0.221	95	-0.221	97
CWC25	ENST00000225428.5	hsa-miR-493-5p	3	-0.262	97	-0.262	98
DDX5	ENST00000225792.5	hsa-miR-493-5p	2	-0.24	96	-0.24	97
DDX50	ENST00000373585.3	hsa-miR-493-5p	2	-0.25	96	-0.25	97
DHX36	ENST00000496811.1	hsa-miR-493-5p	3	-0.198	94	-0.191	96
DLL1	ENST00000366756.3	hsa-miR-493-5p	3	-0.302	98	-0.302	98
DYRK4	ENST00000545342.1	hsa-miR-493-5p	1	-0.296	98	-0.278	98
EED	ENST00000327320.4	hsa-miR-493-5p	3	-0.223	95	-0.223	97
FLJ00104	ENST00000446344.1	hsa-miR-493-5p	3	-0.196	94	-0.196	96
FOXJ3	ENST00000372571.1	hsa-miR-493-5p	3	-0.448	99	-0.448	99
FUBP1	ENST00000370767.1	hsa-miR-493-5p	3	-0.346	98	-0.346	99
GABRA5	ENST00000335625.5	hsa-miR-493-5p	3	-0.34	98	-0.34	99
GABRG2	ENST00000356592.3	hsa-miR-493-5p	3	-0.205	94	-0.205	96
GART	ENST00000361093.5	hsa-miR-493-5p	3	-0.281	97	-0.281	98
GATA2	ENST00000341105.2	hsa-miR-493-5p	3	-0.312	98	-0.312	98
GNG11	ENST00000248564.5	hsa-miR-493-5p	3	-0.587	99	-0.586	99
GOLM1	ENST00000388712.3	hsa-miR-493-5p	3	-0.277	97	-0.262	98
GPR176	ENST00000299092.3	hsa-miR-493-5p	3	-0.273	97	-0.272	98
GREM2	ENST00000318160.4	hsa-miR-493-5p	3	-0.223	95	-0.218	97
GTF2IRD1	ENST00000476977.1	hsa-miR-493-5p	3	-0.274	97	-0.274	98
HEMGN	ENST00000259456.3	hsa-miR-493-5p	2	-0.2	94	-0.2	96
HMGXB4	ENST00000216106.5	hsa-miR-493-5p	3	-0.255	97	-0.255	98
HNRNPA0	ENST00000314940.4	hsa-miR-493-5p	3	-0.45	99	-0.45	99
HS3ST3B1	ENST00000360954.2	hsa-miR-493-5p	3	-0.276	97	-0.271	98
IGSF1	ENST00000370900.1	hsa-miR-493-5p	2	-0.222	95	-0.222	97
INSM2	ENST00000307169.3	hsa-miR-493-5p	2	-0.249	96	-0.249	97
IRX3	ENST00000329734.3	hsa-miR-493-5p	2	-0.215	95	-0.209	96
ITGB1	ENST00000396033.2	hsa-miR-493-5p	3	-0.262	97	-0.262	98
KIAA0408	ENST00000483725.3	hsa-miR-493-5p	3	-0.264	97	-0.264	98
KIAA2026	ENST00000399933.3	hsa-miR-493-5p	3	-0.228	96	-0.228	97
KIF18A	ENST00000263181.6	hsa-miR-493-5p	3	-0.334	98	-0.321	98
LMO3	ENST00000354662.1	hsa-miR-493-5p	2	-0.242	96	-0.242	97
LRIG1	ENST00000273261.3	hsa-miR-493-5p	3	-0.219	95	-0.217	97
LRP12	ENST00000424843.2	hsa-miR-493-5p	3	-0.226	96	-0.226	97
MARS	ENST00000262027.5	hsa-miR-493-5p	3	-0.646	99	-0.646	99
MBD5	ENST00000407073.1	hsa-miR-493-5p	3	-0.274	97	-0.274	98
MEF2C	ENST00000340208.5	hsa-miR-493-5p	2	-0.209	95	-0.209	96
METTL21A	ENST00000448823.2	hsa-miR-493-5p	2	-0.251	97	-0.251	98
MLLT10	ENST00000377072.3	hsa-miR-493-5p	3	-0.274	97	-0.274	98
NAB1	ENST00000337386.5	hsa-miR-493-5p	3	-0.235	96	-0.235	97
NCAPH	ENST00000240423.4	hsa-miR-493-5p	2	-0.231	96	-0.229	97
NCL	ENST00000322723.4	hsa-miR-493-5p	3	-0.303	98	-0.303	98
NEO1	ENST00000261908.6	hsa-miR-493-5p	3	-0.199	94	-0.199	96
NUDCD1	ENST00000239690.4	hsa-miR-493-5p	3	-0.299	98	-0.299	98
NUDT17	ENST00000334513.5	hsa-miR-493-5p	3	-0.472	99	-0.472	99
P4HA1	ENST00000307116.2	hsa-miR-493-5p	3	-0.307	98	-0.193	96
PAPSS2	ENST00000361175.4	hsa-miR-493-5p	3	-0.387	99	-0.261	98
PCNP	ENST00000296024.5	hsa-miR-493-5p	2	-0.232	96	-0.224	97
PGRMC2	ENST00000296425.5	hsa-miR-493-5p	3	-0.245	96	-0.209	96
PITX2	ENST00000394595.3	hsa-miR-493-5p	3	-0.343	98	-0.343	99
PPP1CC	ENST00000335007.5	hsa-miR-493-5p	3	-0.293	98	-0.289	98
PPP3CA	ENST00000512215.1	hsa-miR-493-5p	3	-0.249	96	-0.249	97
PRDM12	ENST00000253008.2	hsa-miR-493-5p	3	-0.271	97	-0.271	98
PSD2	ENST00000274710.3	hsa-miR-493-5p	2	-0.197	94	-0.197	96
PTCH1	ENST00000430669.2	hsa-miR-493-5p	3	-0.227	96	-0.207	96
PVRL3	ENST00000319792.3	hsa-miR-493-5p	3	-0.211	95	-0.208	96
RASL11B	ENST00000248706.3	hsa-miR-493-5p	3	-0.512	99	-0.512	99
RASSF8	ENST00000541490.1	hsa-miR-493-5p	3	-0.203	94	-0.202	96
RGS10	ENST00000392865.1	hsa-miR-493-5p	3	-0.608	99	-0.608	99
RNF214	ENST00000530849.1	hsa-miR-493-5p	2	-0.212	95	-0.212	96
SCAMP2	ENST00000268099.9	hsa-miR-493-5p	3	-0.31	98	-0.276	98
SERPINB7	ENST00000398019.2	hsa-miR-493-5p	2	-0.248	96	-0.248	97
SH2B3	ENST00000341259.2	hsa-miR-493-5p	3	-0.262	97	-0.221	97
SLC25A12	ENST00000422440.2	hsa-miR-493-5p	2	-0.199	94	-0.199	96
SNRPB2	ENST00000377943.5	hsa-miR-493-5p	1	-0.241	96	-0.24	97
SNX9	ENST00000392185.3	hsa-miR-493-5p	3	-0.305	98	-0.191	96
SPINT2	ENST00000301244.7	hsa-miR-493-5p	3	-0.535	99	-0.534	99
SPIRE2	ENST00000378247.3	hsa-miR-493-5p	2	-0.221	95	-0.221	97
SRPK2	ENST00000393651.3	hsa-miR-493-5p	3	-0.261	97	-0.259	98
SRSF3	ENST00000373715.6	hsa-miR-493-5p	2	-0.196	94	-0.196	96
STAM	ENST00000377524.3	hsa-miR-493-5p	2	-0.202	94	-0.202	96
STT3B	ENST00000295770.2	hsa-miR-493-5p	3	-0.266	97	-0.266	98
SUV39H1	ENST00000453214.2	hsa-miR-493-5p	3	-0.293	98	-0.29	98
TM2D3	ENST00000347970.3	hsa-miR-493-5p	2	-0.238	96	-0.238	97
TMEM106B	ENST00000396667.3	hsa-miR-493-5p	3	-0.355	98	-0.354	99
TNFAIP8	ENST00000504771.2	hsa-miR-493-5p	3	-0.293	98	-0.293	98
TPM3	ENST00000368531.2	hsa-miR-493-5p	3	-0.292	98	-0.281	98
TRAF3IP2	ENST00000368761.5	hsa-miR-493-5p	3	-0.223	95	-0.223	97
TSC22D2	ENST00000361875.3	hsa-miR-493-5p	2	-0.225	95	-0.195	96
TSLP	ENST00000379706.4	hsa-miR-493-5p	2	-0.3	98	-0.3	98
UCK2	ENST00000372212.4	hsa-miR-493-5p	3	-0.395	99	-0.216	97
USMG5	ENST00000369825.1	hsa-miR-493-5p	1	-0.278	97	-0.277	98
VAMP2	ENST00000404970.3	hsa-miR-493-5p	3	-0.431	99	-0.423	99
WBP11	ENST00000261167.2	hsa-miR-493-5p	3	-0.31	98	-0.289	98
ZIC2	ENST00000376335.3	hsa-miR-493-5p	3	-0.355	98	-0.355	99
ZMYM5	ENST00000382907.4	hsa-miR-493-5p	3	-0.524	99	-0.524	99
ZNF384	ENST00000319770.3	hsa-miR-493-5p	3	-0.239	96	-0.213	96
ZNF706	ENST00000311212.4	hsa-miR-493-5p	2	-0.213	95	-0.213	96
AC026703.1	ENST00000326958.1	hsa-miR-494-3p	2	-0.246	98	-0.136	96
ACBD4	ENST00000398322.3	hsa-miR-494-3p	3	-0.329	99	-0.329	99
ACTRT3	ENST00000330368.2	hsa-miR-494-3p	2	-0.197	97	-0.193	98
AL590452.1	ENST00000596396.1	hsa-miR-494-3p	3	-0.32	99	-0.32	99
ANKS1B	ENST00000546960.1	hsa-miR-494-3p	3	-0.165	95	-0.165	97
ARID4B	ENST00000349213.3	hsa-miR-494-3p	2	-0.137	94	-0.137	96
ATF3	ENST00000366983.1	hsa-miR-494-3p	2	-0.138	94	-0.138	96
ATXN3	ENST00000545170.1	hsa-miR-494-3p	3	-0.352	99	-0.26	99
B3GALT2	ENST00000367434.4	hsa-miR-494-3p	3	-0.263	98	-0.263	99
BBC3	ENST00000341983.4	hsa-miR-494-3p	2	-0.214	97	-0.214	98
BEND6	ENST00000370750.2	hsa-miR-494-3p	3	-0.252	98	-0.252	99
BHLHE40	ENST00000256495.3	hsa-miR-494-3p	3	-0.251	98	-0.246	99
C11orf30	ENST00000529032.1	hsa-miR-494-3p	3	-0.143	94	-0.134	96
C17orf100	ENST00000391428.2	hsa-miR-494-3p	3	-0.294	99	-0.181	97
C1QTNF7	ENST00000429690.1	hsa-miR-494-3p	2	-0.18	96	-0.18	97
C3orf62	ENST00000343010.3	hsa-miR-494-3p	2	-0.175	96	-0.175	97
CAMK1	ENST00000256460.3	hsa-miR-494-3p	2	-0.33	99	-0.33	99
CAV2	ENST00000222693.4	hsa-miR-494-3p	3	-0.273	98	-0.263	99
CBLL1	ENST00000440859.3	hsa-miR-494-3p	3	-0.194	97	-0.158	97
CCRN4L	ENST00000280614.2	hsa-miR-494-3p	3	-0.213	97	-0.202	98
CDK6	ENST00000265734.4	hsa-miR-494-3p	1	-0.177	96	-0.176	97
CEP57L1	ENST00000368968.2	hsa-miR-494-3p	2	-0.138	94	-0.133	96
CFTR	ENST00000454343.1	hsa-miR-494-3p	3	-0.157	95	-0.157	97
CKS1B	ENST00000308987.5	hsa-miR-494-3p	3	-0.255	98	-0.255	99
CLPTM1L	ENST00000320895.5	hsa-miR-494-3p	2	-0.225	98	-0.225	98
CNIH1	ENST00000395573.4	hsa-miR-494-3p	2	-0.151	95	-0.151	96
CNR1	ENST00000362094.5	hsa-miR-494-3p	3	-0.224	98	-0.16	97
CYSTM1	ENST00000261811.4	hsa-miR-494-3p	3	-0.496	99	-0.493	99
DBR1	ENST00000260803.4	hsa-miR-494-3p	3	-0.195	97	-0.195	98
DBX2	ENST00000332700.6	hsa-miR-494-3p	3	-0.294	99	-0.14	96
DCP1B	ENST00000280665.6	hsa-miR-494-3p	2	-0.29	99	-0.29	99
DLGAP1	ENST00000400145.2	hsa-miR-494-3p	3	-0.343	99	-0.343	99
DNAJA2	ENST00000317089.5	hsa-miR-494-3p	3	-0.314	99	-0.313	99
DSCAML1	ENST00000527706.1	hsa-miR-494-3p	2	-0.161	95	-0.161	97
EIF1	ENST00000469257.1	hsa-miR-494-3p	3	-0.238	98	-0.238	98
EIF1B	ENST00000232905.3	hsa-miR-494-3p	2	-0.216	97	-0.21	98
ELF1	ENST00000442101.1	hsa-miR-494-3p	3	-0.17	96	-0.17	97
ELOVL5	ENST00000370918.4	hsa-miR-494-3p	3	-0.142	94	-0.142	96
FHOD3	ENST00000257209.4	hsa-miR-494-3p	3	-0.185	96	-0.185	97
FOXJ3	ENST00000372571.1	hsa-miR-494-3p	2	-0.14	94	-0.137	96
GGNBP2	ENST00000304718.4	hsa-miR-494-3p	2	-0.194	97	-0.14	96
GTF3C6	ENST00000329970.7	hsa-miR-494-3p	2	-0.215	97	-0.215	98
GULP1	ENST00000409843.1	hsa-miR-494-3p	3	-0.231	98	-0.225	98
H3F3A	ENST00000366813.1	hsa-miR-494-3p	3	-0.376	99	-0.376	99
HIVEP1	ENST00000379388.2	hsa-miR-494-3p	3	-0.21	97	-0.21	98
HMGCS1	ENST00000325110.6	hsa-miR-494-3p	3	-0.182	96	-0.17	97
HSPA13	ENST00000285667.3	hsa-miR-494-3p	3	-0.167	96	-0.167	97
IKBKAP	ENST00000374647.5	hsa-miR-494-3p	3	-0.18	96	-0.177	97
JAKMIP2	ENST00000507386.1	hsa-miR-494-3p	3	-0.207	97	-0.207	98
JUND	ENST00000252818.3	hsa-miR-494-3p	2	-0.205	97	-0.205	98
KCTD14	ENST00000353172.5	hsa-miR-494-3p	3	-0.219	97	-0.219	98
KIAA0895	ENST00000297063.6	hsa-miR-494-3p	2	-0.16	95	-0.16	97
KLRC4	ENST00000309384.1	hsa-miR-494-3p	3	-0.417	99	-0.417	99
LAMP5	ENST00000246070.2	hsa-miR-494-3p	3	-0.196	97	-0.196	98
LEFTY2	ENST00000420304.2	hsa-miR-494-3p	3	-0.282	99	-0.282	99
LUM	ENST00000266718.4	hsa-miR-494-3p	2	-0.221	98	-0.221	98
MESDC1	ENST00000267984.2	hsa-miR-494-3p	2	-0.163	95	-0.163	97
MORF4L2	ENST00000360458.1	hsa-miR-494-3p	3	-0.266	98	-0.266	99
MOSPD2	ENST00000380492.3	hsa-miR-494-3p	3	-0.204	97	-0.17	97
MRPL45	ENST00000312513.5	hsa-miR-494-3p	3	-0.189	97	-0.189	98
MRPS23	ENST00000313608.8	hsa-miR-494-3p	2	-0.291	99	-0.291	99
MSANTD2	ENST00000239614.4	hsa-miR-494-3p	3	-0.337	99	-0.292	99
NHLH2	ENST00000320238.3	hsa-miR-494-3p	3	-0.29	99	-0.29	99
NMNAT2	ENST00000294868.4	hsa-miR-494-3p	3	-0.22	97	-0.22	98
NNT	ENST00000264663.5	hsa-miR-494-3p	3	-0.193	97	-0.191	98
NRG3	ENST00000372142.2	hsa-miR-494-3p	3	-0.174	96	-0.174	97
NUTF2	ENST00000219169.4	hsa-miR-494-3p	3	-0.208	97	-0.208	98
OTUD3	ENST00000375120.3	hsa-miR-494-3p	2	-0.158	95	-0.15	96
P4HA1	ENST00000307116.2	hsa-miR-494-3p	3	-0.143	94	-0.143	96
PDCL3	ENST00000264254.6	hsa-miR-494-3p	3	-0.479	99	-0.479	99
PGPEP1L	ENST00000535714.1	hsa-miR-494-3p	3	-0.46	99	-0.46	99
PHOX2B	ENST00000226382.2	hsa-miR-494-3p	3	-0.243	98	-0.243	99
PITPNB	ENST00000335272.5	hsa-miR-494-3p	3	-0.193	97	-0.193	98
PITX2	ENST00000394595.3	hsa-miR-494-3p	2	-0.202	97	-0.202	98
PLA2G12B	ENST00000373032.3	hsa-miR-494-3p	3	-0.242	98	-0.242	98
PNOC	ENST00000301908.3	hsa-miR-494-3p	3	-0.134	93	-0.134	96
PPM1D	ENST00000305921.3	hsa-miR-494-3p	2	-0.149	95	-0.136	96
PPP2R2B	ENST00000394413.3	hsa-miR-494-3p	2	-0.185	96	-0.185	97
PPWD1	ENST00000261308.5	hsa-miR-494-3p	3	-0.423	99	-0.42	99
PRR14	ENST00000300835.4	hsa-miR-494-3p	2	-0.335	99	-0.334	99
PRRG1	ENST00000378628.4	hsa-miR-494-3p	2	-0.152	95	-0.149	96
PTEN	ENST00000371953.3	hsa-miR-494-3p	3	-0.289	99	-0.223	98
PTEN	ENST00000371953.3	hsa-miR-494-3p	3	-0.25	98	-0.17	97
PTPN12	ENST00000248594.6	hsa-miR-494-3p	3	-0.214	97	-0.207	98
RAB5A	ENST00000273047.4	hsa-miR-494-3p	3	-0.298	99	-0.298	99
RAD23B	ENST00000358015.3	hsa-miR-494-3p	3	-0.206	97	-0.165	97
RBM18	ENST00000417201.3	hsa-miR-494-3p	2	-0.156	95	-0.154	97
RCAN2	ENST00000330430.6	hsa-miR-494-3p	3	-0.133	93	-0.133	96
RDH10	ENST00000240285.5	hsa-miR-494-3p	3	-0.139	94	-0.139	96
RP11-676J12.7	ENST00000576252.1	hsa-miR-494-3p	2	-0.272	98	-0.272	99
RRM2B	ENST00000251810.3	hsa-miR-494-3p	3	-0.191	97	-0.133	96
RUFY1	ENST00000377001.2	hsa-miR-494-3p	3	-0.168	96	-0.168	97
RWDD4	ENST00000326397.5	hsa-miR-494-3p	2	-0.15	95	-0.15	96
SCD5	ENST00000319540.4	hsa-miR-494-3p	3	-0.157	95	-0.157	97
SERINC4	ENST00000299969.6	hsa-miR-494-3p	3	-0.245	98	-0.134	96
SERP1	ENST00000239944.2	hsa-miR-494-3p	2	-0.197	97	-0.197	98
SFSWAP	ENST00000261674.4	hsa-miR-494-3p	2	-0.14	94	-0.14	96
SHOC2	ENST00000369452.4	hsa-miR-494-3p	2	-0.171	96	-0.171	97
SIRT1	ENST00000212015.6	hsa-miR-494-3p	3	-0.181	96	-0.176	97
SLA2	ENST00000262866.4	hsa-miR-494-3p	3	-0.245	98	-0.245	99
SLC25A40	ENST00000341119.5	hsa-miR-494-3p	3	-0.184	96	-0.169	97
SLC26A3	ENST00000422236.2	hsa-miR-494-3p	3	-0.278	99	-0.278	99
SLC35F5	ENST00000245680.2	hsa-miR-494-3p	3	-0.256	98	-0.256	99
SLC39A1	ENST00000356205.4	hsa-miR-494-3p	2	-0.149	95	-0.149	96
SLC46A3	ENST00000266943.6	hsa-miR-494-3p	3	-0.183	96	-0.183	97
SRSF7	ENST00000313117.6	hsa-miR-494-3p	2	-0.271	98	-0.269	99
STAC2	ENST00000333461.5	hsa-miR-494-3p	2	-0.18	96	-0.176	97
STAMBPL1	ENST00000371926.3	hsa-miR-494-3p	2	-0.132	93	-0.132	96
SUV39H2	ENST00000313519.5	hsa-miR-494-3p	3	-0.193	97	-0.143	96
TACC2	ENST00000513429.1	hsa-miR-494-3p	3	-0.254	98	-0.196	98
TAOK3	ENST00000419821.2	hsa-miR-494-3p	3	-0.141	94	-0.141	96
TCF7L2	ENST00000369386.1	hsa-miR-494-3p	2	-0.149	95	-0.144	96
TMEM135	ENST00000340353.7	hsa-miR-494-3p	3	-0.266	98	-0.266	99
TMEM154	ENST00000304385.3	hsa-miR-494-3p	3	-0.142	94	-0.142	96
TOR1AIP1	ENST00000606911.2	hsa-miR-494-3p	3	-0.242	98	-0.198	98
UBP1	ENST00000283629.3	hsa-miR-494-3p	3	-0.211	97	-0.211	98
UFL1	ENST00000369278.4	hsa-miR-494-3p	3	-0.188	96	-0.188	97
WDR45B	ENST00000392325.4	hsa-miR-494-3p	2	-0.187	96	-0.187	97
WDR83OS	ENST00000596731.1	hsa-miR-494-3p	2	-0.18	96	-0.18	97
YBX1	ENST00000321358.7	hsa-miR-494-3p	1	-0.164	95	-0.164	97
ZC3H7A	ENST00000396516.2	hsa-miR-494-3p	3	-0.242	98	-0.242	98
ZIC2	ENST00000376335.3	hsa-miR-494-3p	2	-0.152	95	-0.152	96
ABCA2	ENST00000341511.6	hsa-miR-495-3p	2	-0.107	95	-0.107	97
ACTC1	ENST00000290378.4	hsa-miR-495-3p	2	-0.217	99	-0.217	99
ADAT2	ENST00000606514.1	hsa-miR-495-3p	2	-0.106	95	-0.1	96
ANKRD7	ENST00000357099.4	hsa-miR-495-3p	3	-0.313	99	-0.313	99
AP3M1	ENST00000355264.4	hsa-miR-495-3p	2	-0.097	95	-0.097	96
ASB5	ENST00000296525.3	hsa-miR-495-3p	3	-0.279	99	-0.279	99
B3GAT1	ENST00000392580.1	hsa-miR-495-3p	3	-0.09	94	-0.09	96
BARX2	ENST00000281437.4	hsa-miR-495-3p	2	-0.124	96	-0.124	97
BMI1	ENST00000376663.3	hsa-miR-495-3p	3	-0.102	95	-0.097	96
BRINP1	ENST00000265922.3	hsa-miR-495-3p	3	-0.172	98	-0.172	98
BRMS1L	ENST00000216807.7	hsa-miR-495-3p	2	-0.152	97	-0.149	98
BUB1	ENST00000535254.1	hsa-miR-495-3p	3	-0.336	99	-0.289	99
C17orf96	ENST00000325814.5	hsa-miR-495-3p	2	-0.237	99	-0.237	99
C18orf25	ENST00000282059.6	hsa-miR-495-3p	2	-0.096	94	-0.093	96
C21orf59	ENST00000382549.4	hsa-miR-495-3p	2	-0.103	95	-0.103	96
C6orf211	ENST00000367294.3	hsa-miR-495-3p	2	-0.106	95	-0.098	96
C9orf170	ENST00000375941.2	hsa-miR-495-3p	3	-0.14	97	-0.14	98
C9orf47	ENST00000375851.2	hsa-miR-495-3p	2	-0.13	96	-0.13	97
CAST	ENST00000395812.2	hsa-miR-495-3p	3	-0.232	99	-0.232	99
CBX4	ENST00000269397.4	hsa-miR-495-3p	3	-0.253	99	-0.183	99
CCNT2	ENST00000295238.6	hsa-miR-495-3p	2	-0.093	94	-0.093	96
CDC34	ENST00000215574.4	hsa-miR-495-3p	2	-0.166	98	-0.137	98
CEP63	ENST00000337090.3	hsa-miR-495-3p	2	-0.186	98	-0.186	99
CMTM8	ENST00000307526.3	hsa-miR-495-3p	3	-0.314	99	-0.314	99
CNBP	ENST00000502976.1	hsa-miR-495-3p	2	-0.201	99	-0.14	98
COX7A2L	ENST00000378669.1	hsa-miR-495-3p	2	-0.176	98	-0.142	98
CPSF6	ENST00000435070.2	hsa-miR-495-3p	2	-0.112	95	-0.101	96
CTNND2	ENST00000304623.8	hsa-miR-495-3p	3	-0.135	97	-0.135	98
CYTH1	ENST00000585509.1	hsa-miR-495-3p	2	-0.125	96	-0.125	97
CYTH1	ENST00000585509.1	hsa-miR-495-3p	2	-0.105	95	-0.105	96
DACT1	ENST00000395153.3	hsa-miR-495-3p	3	-0.218	99	-0.088	96
DBI	ENST00000355857.3	hsa-miR-495-3p	1	-0.153	97	-0.147	98
DDHD2	ENST00000397166.2	hsa-miR-495-3p	2	-0.144	97	-0.119	97
DDIT4	ENST00000307365.3	hsa-miR-495-3p	3	-0.422	99	-0.091	96
DDX3X	ENST00000399959.2	hsa-miR-495-3p	3	-0.123	96	-0.123	97
DGAT2L6	ENST00000333026.3	hsa-miR-495-3p	2	-0.147	97	-0.147	98
DHX40	ENST00000251241.4	hsa-miR-495-3p	3	-0.148	97	-0.145	98
DIS3	ENST00000377767.4	hsa-miR-495-3p	3	-0.149	97	-0.149	98
DNAJC14	ENST00000357606.3	hsa-miR-495-3p	2	-0.106	95	-0.106	96
DUSP1	ENST00000239223.3	hsa-miR-495-3p	2	-0.106	95	-0.106	96
DYRK1A	ENST00000339659.4	hsa-miR-495-3p	2	-0.089	94	-0.089	96
ELAVL1	ENST00000407627.2	hsa-miR-495-3p	2	-0.199	98	-0.14	98
ELOVL7	ENST00000508821.1	hsa-miR-495-3p	2	-0.167	98	-0.167	98
ETS1	ENST00000531611.1	hsa-miR-495-3p	2	-0.11	95	-0.104	96
FAM187A	ENST00000412523.2	hsa-miR-495-3p	3	-0.331	99	-0.331	99
FAM216A	ENST00000377673.5	hsa-miR-495-3p	2	-0.196	98	-0.196	99
FBXO46	ENST00000317683.3	hsa-miR-495-3p	2	-0.106	95	-0.101	96
FEM1C	ENST00000274457.3	hsa-miR-495-3p	3	-0.128	96	-0.123	97
FKBP5	ENST00000536438.1	hsa-miR-495-3p	3	-0.138	97	-0.138	98
FNBP1	ENST00000355681.3	hsa-miR-495-3p	3	-0.166	98	-0.141	98
FOXK2	ENST00000335255.5	hsa-miR-495-3p	2	-0.103	95	-0.103	96
FUBP1	ENST00000370767.1	hsa-miR-495-3p	2	-0.111	95	-0.111	97
GFI1	ENST00000370332.1	hsa-miR-495-3p	3	-0.172	98	-0.163	98
GPR22	ENST00000304402.4	hsa-miR-495-3p	3	-0.298	99	-0.298	99
GPR63	ENST00000229955.3	hsa-miR-495-3p	3	-0.13	96	-0.13	97
GRAMD4	ENST00000361034.3	hsa-miR-495-3p	2	-0.115	96	-0.11	97
GRSF1	ENST00000254799.6	hsa-miR-495-3p	2	-0.146	97	-0.107	97
HNRNPF	ENST00000357065.4	hsa-miR-495-3p	2	-0.14	97	-0.092	96
HNRNPH2	ENST00000316594.5	hsa-miR-495-3p	3	-0.193	98	-0.193	99
HNRNPUL2	ENST00000301785.5	hsa-miR-495-3p	2	-0.098	95	-0.098	96
HOXC9	ENST00000303450.4	hsa-miR-495-3p	3	-0.204	99	-0.173	98
HSDL2	ENST00000398805.3	hsa-miR-495-3p	2	-0.221	99	-0.213	99
HSDL2	ENST00000398805.3	hsa-miR-495-3p	2	-0.145	97	-0.14	98
HSPA13	ENST00000285667.3	hsa-miR-495-3p	2	-0.104	95	-0.092	96
HSPA5	ENST00000324460.6	hsa-miR-495-3p	3	-0.257	99	-0.257	99
ITGB5	ENST00000296181.4	hsa-miR-495-3p	2	-0.102	95	-0.086	96
ITM2B	ENST00000378565.5	hsa-miR-495-3p	3	-0.25	99	-0.238	99
JDP2	ENST00000435893.2	hsa-miR-495-3p	3	-0.175	98	-0.173	98
KCTD16	ENST00000507359.3	hsa-miR-495-3p	2	-0.092	94	-0.092	96
KIAA0101	ENST00000558008.1	hsa-miR-495-3p	2	-0.208	99	-0.208	99
KLF5	ENST00000377687.4	hsa-miR-495-3p	3	-0.087	94	-0.087	96
KLHL5	ENST00000261425.3	hsa-miR-495-3p	3	-0.143	97	-0.086	96
LARGE	ENST00000354992.2	hsa-miR-495-3p	2	-0.101	95	-0.101	96
LHX2	ENST00000373615.4	hsa-miR-495-3p	3	-0.274	99	-0.274	99
LHX9	ENST00000367390.3	hsa-miR-495-3p	3	-0.089	94	-0.089	96
LPCAT3	ENST00000261407.4	hsa-miR-495-3p	2	-0.117	96	-0.116	97
MBLAC2	ENST00000316610.6	hsa-miR-495-3p	3	-0.126	96	-0.116	97
MBTD1	ENST00000586178.1	hsa-miR-495-3p	2	-0.09	94	-0.09	96
MCMBP	ENST00000360003.3	hsa-miR-495-3p	2	-0.18	98	-0.18	98
METTL7A	ENST00000332160.4	hsa-miR-495-3p	2	-0.137	97	-0.136	98
MGAT2	ENST00000305386.2	hsa-miR-495-3p	3	-0.212	99	-0.096	96
MINK1	ENST00000347992.7	hsa-miR-495-3p	3	-0.162	98	-0.161	98
MOB3B	ENST00000262244.5	hsa-miR-495-3p	2	-0.086	94	-0.086	96
MORF4L1	ENST00000331268.5	hsa-miR-495-3p	2	-0.255	99	-0.255	99
MVB12B	ENST00000361171.3	hsa-miR-495-3p	2	-0.124	96	-0.124	97
MYCBP	ENST00000397572.2	hsa-miR-495-3p	3	-0.226	99	-0.142	98
NABP1	ENST00000410026.2	hsa-miR-495-3p	3	-0.247	99	-0.247	99
NAP1L1	ENST00000261182.8	hsa-miR-495-3p	2	-0.147	97	-0.147	98
NKX2-1	ENST00000354822.5	hsa-miR-495-3p	2	-0.139	97	-0.139	98
NKX6-1	ENST00000515820.2	hsa-miR-495-3p	2	-0.102	95	-0.102	96
NR6A1	ENST00000487099.2	hsa-miR-495-3p	2	-0.146	97	-0.146	98
P4HA2	ENST00000401867.1	hsa-miR-495-3p	2	-0.144	97	-0.144	98
PAFAH1B2	ENST00000527958.1	hsa-miR-495-3p	2	-0.13	96	-0.13	97
PAQR9	ENST00000340634.3	hsa-miR-495-3p	2	-0.134	97	-0.134	97
PDCD10	ENST00000392750.2	hsa-miR-495-3p	2	-0.166	98	-0.154	98
PDCL	ENST00000259467.4	hsa-miR-495-3p	2	-0.133	97	-0.114	97
PHF7	ENST00000327906.3	hsa-miR-495-3p	2	-0.098	95	-0.098	96
PI15	ENST00000260113.2	hsa-miR-495-3p	2	-0.085	94	-0.085	96
PLEKHH3	ENST00000591022.1	hsa-miR-495-3p	2	-0.219	99	-0.219	99
POLR1C	ENST00000372389.3	hsa-miR-495-3p	1	-0.089	94	-0.089	96
POU3F1	ENST00000373012.2	hsa-miR-495-3p	3	-0.11	95	-0.11	97
PPP1CB	ENST00000395366.2	hsa-miR-495-3p	2	-0.129	96	-0.129	97
PRR7	ENST00000323249.3	hsa-miR-495-3p	3	-0.188	98	-0.188	99
PSMC6	ENST00000445930.2	hsa-miR-495-3p	3	-0.433	99	-0.433	99
PSME3	ENST00000541124.1	hsa-miR-495-3p	3	-0.247	99	-0.247	99
PTK7	ENST00000230419.4	hsa-miR-495-3p	2	-0.182	98	-0.182	99
R3HDM2	ENST00000347140.3	hsa-miR-495-3p	2	-0.119	96	-0.119	97
RAN	ENST00000543796.1	hsa-miR-495-3p	3	-0.299	99	-0.29	99
RASD2	ENST00000216127.4	hsa-miR-495-3p	3	-0.138	97	-0.138	98
RBM8A	ENST00000330165.8	hsa-miR-495-3p	3	-0.096	94	-0.096	96
RBX1	ENST00000216225.8	hsa-miR-495-3p	1	-0.139	97	-0.139	98
RCOR1	ENST00000262241.6	hsa-miR-495-3p	2	-0.136	97	-0.104	96
REV1	ENST00000393445.3	hsa-miR-495-3p	2	-0.183	98	-0.183	99
RGS17	ENST00000367225.2	hsa-miR-495-3p	2	-0.117	96	-0.117	97
RHEB	ENST00000262187.5	hsa-miR-495-3p	2	-0.186	98	-0.186	99
RP11-187E13.2	ENST00000556949.1	hsa-miR-495-3p	2	-0.378	99	-0.378	99
RP11-192H23.4	ENST00000534850.1	hsa-miR-495-3p	2	-0.106	95	-0.106	96
RPL36A-HNRNPH2	ENST00000409170.3	hsa-miR-495-3p	3	-0.199	98	-0.186	99
RPRD1A	ENST00000399022.4	hsa-miR-495-3p	2	-0.133	97	-0.133	97
S1PR3	ENST00000358157.2	hsa-miR-495-3p	3	-0.251	99	-0.185	99
SATB1	ENST00000338745.6	hsa-miR-495-3p	3	-0.123	96	-0.119	97
SEPT11	ENST00000264893.6	hsa-miR-495-3p	3	-0.089	94	-0.085	96
SEPT7	ENST00000435235.1	hsa-miR-495-3p	2	-0.097	95	-0.097	96
SEPT7	ENST00000435235.1	hsa-miR-495-3p	2	-0.107	95	-0.107	97
SGK494	ENST00000301037.5	hsa-miR-495-3p	2	-0.108	95	-0.108	97
SH2D2A	ENST00000368198.3	hsa-miR-495-3p	2	-0.161	98	-0.161	98
SIX1	ENST00000247182.6	hsa-miR-495-3p	2	-0.156	98	-0.156	98
SMAD9	ENST00000399275.2	hsa-miR-495-3p	2	-0.131	96	-0.094	96
SMNDC1	ENST00000369603.5	hsa-miR-495-3p	2	-0.127	96	-0.126	97
SNAP25	ENST00000254976.2	hsa-miR-495-3p	3	-0.098	95	-0.098	96
SNRPB	ENST00000381342.2	hsa-miR-495-3p	2	-0.166	98	-0.166	98
SNRPB2	ENST00000377943.5	hsa-miR-495-3p	2	-0.245	99	-0.245	99
SNRPF	ENST00000266735.5	hsa-miR-495-3p	2	-0.317	99	-0.315	99
SOGA3	ENST00000556132.1	hsa-miR-495-3p	2	-0.16	98	-0.16	98
SPICE1	ENST00000295872.4	hsa-miR-495-3p	2	-0.141	97	-0.141	98
SUPT16H	ENST00000216297.2	hsa-miR-495-3p	2	-0.094	94	-0.093	96
SZRD1	ENST00000401089.3	hsa-miR-495-3p	2	-0.156	98	-0.108	97
TESC	ENST00000335209.7	hsa-miR-495-3p	3	-0.367	99	-0.284	99
TEX261	ENST00000272438.4	hsa-miR-495-3p	2	-0.193	98	-0.141	98
TGFB2	ENST00000366930.4	hsa-miR-495-3p	3	-0.13	96	-0.13	97
THAP11	ENST00000303596.1	hsa-miR-495-3p	2	-0.147	97	-0.147	98
THBS2	ENST00000366787.3	hsa-miR-495-3p	2	-0.122	96	-0.122	97
TIMP2	ENST00000585421.1	hsa-miR-495-3p	2	-0.123	96	-0.111	97
TMED2	ENST00000262225.3	hsa-miR-495-3p	2	-0.119	96	-0.119	97
TMEM183A	ENST00000367242.3	hsa-miR-495-3p	2	-0.133	97	-0.133	97
TMEM50B	ENST00000542230.2	hsa-miR-495-3p	1	-0.141	97	-0.141	98
TNFRSF1B	ENST00000376259.3	hsa-miR-495-3p	2	-0.158	98	-0.158	98
TNFRSF21	ENST00000296861.2	hsa-miR-495-3p	3	-0.208	99	-0.19	99
TPH1	ENST00000250018.2	hsa-miR-495-3p	3	-0.1	95	-0.1	96
TSC22D3	ENST00000372390.4	hsa-miR-495-3p	2	-0.18	98	-0.18	98
TUBB	ENST00000327892.8	hsa-miR-495-3p	2	-0.128	96	-0.091	96
TWF1	ENST00000552521.1	hsa-miR-495-3p	2	-0.106	95	-0.106	96
U2SURP	ENST00000397933.2	hsa-miR-495-3p	2	-0.09	94	-0.09	96
UAP1	ENST00000367926.4	hsa-miR-495-3p	2	-0.203	99	-0.203	99
UBE2Q1	ENST00000292211.4	hsa-miR-495-3p	3	-0.189	98	-0.189	99
UBE2Z	ENST00000360943.5	hsa-miR-495-3p	2	-0.176	98	-0.166	98
VEZF1	ENST00000584396.1	hsa-miR-495-3p	3	-0.113	96	-0.11	97
YTHDC1	ENST00000344157.4	hsa-miR-495-3p	2	-0.158	98	-0.115	97
ZBTB14	ENST00000357006.4	hsa-miR-495-3p	3	-0.129	96	-0.129	97
ZBTB47	ENST00000457842.3	hsa-miR-495-3p	3	-0.108	95	-0.097	96
ZCCHC8	ENST00000536306.1	hsa-miR-495-3p	3	-0.108	95	-0.108	97
ZFAND3	ENST00000287218.4	hsa-miR-495-3p	3	-0.192	98	-0.12	97
ZFAND5	ENST00000237937.3	hsa-miR-495-3p	3	-0.159	98	-0.158	98
ZMYM3	ENST00000314425.5	hsa-miR-495-3p	2	-0.103	95	-0.103	96
ZNF280C	ENST00000370978.4	hsa-miR-495-3p	2	-0.112	95	-0.112	97
ZNF503	ENST00000372524.4	hsa-miR-495-3p	3	-0.192	98	-0.191	99
AASDHPPT	ENST00000278618.4	hsa-miR-543	2	-0.211	98	-0.192	98
ABHD13	ENST00000375898.3	hsa-miR-543	2	-0.175	97	-0.175	98
AC012215.1	ENST00000437887.1	hsa-miR-543	2	-0.135	95	-0.113	96
ADAM9	ENST00000487273.2	hsa-miR-543	2	-0.129	95	-0.128	96
ADCK3	ENST00000366779.1	hsa-miR-543	3	-0.175	97	-0.175	98
AK3	ENST00000381809.3	hsa-miR-543	3	-0.252	99	-0.215	98
ANKRD13C	ENST00000370944.4	hsa-miR-543	2	-0.142	96	-0.142	97
ARL6	ENST00000463745.1	hsa-miR-543	2	-0.156	96	-0.147	97
BAI3	ENST00000370598.1	hsa-miR-543	2	-0.115	94	-0.115	96
BIRC6	ENST00000421745.2	hsa-miR-543	2	-0.162	97	-0.162	97
BRK1	ENST00000530758.1	hsa-miR-543	2	-0.15	96	-0.15	97
BTBD3	ENST00000254977.3	hsa-miR-543	3	-0.178	97	-0.163	97
C16orf95	ENST00000253461.4	hsa-miR-543	1	-0.191	98	-0.191	98
C20orf62	ENST00000372910.3	hsa-miR-543	1	-0.189	98	-0.189	98
C5orf30	ENST00000319933.2	hsa-miR-543	3	-0.114	94	-0.114	96
CALB1	ENST00000265431.3	hsa-miR-543	3	-0.245	99	-0.245	99
CASK	ENST00000421587.2	hsa-miR-543	3	-0.156	96	-0.153	97
CCAR1	ENST00000265872.6	hsa-miR-543	2	-0.248	99	-0.248	99
CFL1	ENST00000525451.2	hsa-miR-543	2	-0.15	96	-0.132	96
CHN1	ENST00000409900.3	hsa-miR-543	2	-0.16	97	-0.16	97
CLVS1	ENST00000518592.1	hsa-miR-543	3	-0.289	99	-0.289	99
CNNM2	ENST00000369878.4	hsa-miR-543	3	-0.135	95	-0.125	96
COL16A1	ENST00000373672.3	hsa-miR-543	2	-0.214	98	-0.15	97
COX7B	ENST00000481445.1	hsa-miR-543	2	-0.187	97	-0.181	98
CTDSPL	ENST00000443503.2	hsa-miR-543	3	-0.252	99	-0.23	99
CTTNBP2NL	ENST00000271277.6	hsa-miR-543	3	-0.143	96	-0.143	97
CYB5R4	ENST00000369681.5	hsa-miR-543	3	-0.342	99	-0.324	99
CYP3A5	ENST00000339843.2	hsa-miR-543	3	-0.341	99	-0.341	99
CYR61	ENST00000451137.2	hsa-miR-543	2	-0.143	96	-0.142	97
DCAF17	ENST00000375255.3	hsa-miR-543	3	-0.162	97	-0.162	97
DDX46	ENST00000452510.2	hsa-miR-543	3	-0.271	99	-0.154	97
DLX1	ENST00000341900.6	hsa-miR-543	3	-0.305	99	-0.305	99
DNAJB1	ENST00000254322.2	hsa-miR-543	2	-0.112	94	-0.112	96
DNAJC10	ENST00000264065.7	hsa-miR-543	3	-0.218	98	-0.218	99
DSTN	ENST00000246069.7	hsa-miR-543	1	-0.115	94	-0.115	96
EIF1	ENST00000469257.1	hsa-miR-543	1	-0.113	94	-0.111	96
EIF4A2	ENST00000323963.5	hsa-miR-543	3	-0.396	99	-0.302	99
ELAVL4	ENST00000371824.1	hsa-miR-543	2	-0.12	95	-0.12	96
EMC1	ENST00000477853.1	hsa-miR-543	2	-0.158	96	-0.158	97
EPS8	ENST00000543523.1	hsa-miR-543	2	-0.123	95	-0.121	96
ERAS	ENST00000338270.1	hsa-miR-543	3	-0.378	99	-0.249	99
ERLIN1	ENST00000421367.2	hsa-miR-543	3	-0.176	97	-0.176	98
FAM117A	ENST00000240364.2	hsa-miR-543	3	-0.254	99	-0.254	99
FAM160A1	ENST00000435205.1	hsa-miR-543	3	-0.24	98	-0.24	99
FAM160A2	ENST00000449352.2	hsa-miR-543	2	-0.243	98	-0.243	99
FAM189B	ENST00000350210.2	hsa-miR-543	2	-0.163	97	-0.162	97
FAM222A	ENST00000538780.1	hsa-miR-543	2	-0.155	96	-0.139	97
FAM86A	ENST00000458008.4	hsa-miR-543	3	-0.156	96	-0.156	97
FAM86C1	ENST00000359244.4	hsa-miR-543	3	-0.241	98	-0.241	99
FBXO34	ENST00000313833.4	hsa-miR-543	2	-0.177	97	-0.177	98
FBXO34	ENST00000313833.4	hsa-miR-543	2	-0.181	97	-0.181	98
FBXO34	ENST00000313833.4	hsa-miR-543	2	-0.146	96	-0.131	96
FBXO47	ENST00000378079.2	hsa-miR-543	2	-0.124	95	-0.124	96
FKBP4	ENST00000001008.4	hsa-miR-543	3	-0.22	98	-0.22	99
FLJ00388	ENST00000594280.1	hsa-miR-543	1	-0.115	94	-0.115	96
FMNL2	ENST00000475377.2	hsa-miR-543	3	-0.197	98	-0.182	98
GABRA1	ENST00000428797.2	hsa-miR-543	2	-0.114	94	-0.114	96
GNAO1	ENST00000262493.6	hsa-miR-543	2	-0.175	97	-0.175	98
GPBP1	ENST00000424459.3	hsa-miR-543	2	-0.141	96	-0.141	97
GPBP1	ENST00000424459.3	hsa-miR-543	2	-0.151	96	-0.151	97
GPCPD1	ENST00000379019.4	hsa-miR-543	3	-0.236	98	-0.236	99
GPR137B	ENST00000366592.3	hsa-miR-543	3	-0.211	98	-0.137	97
GPR3	ENST00000374024.3	hsa-miR-543	3	-0.163	97	-0.163	97
HEPHL1	ENST00000315765.9	hsa-miR-543	2	-0.126	95	-0.126	96
HERPUD1	ENST00000379792.2	hsa-miR-543	2	-0.122	95	-0.122	96
HMGA2	ENST00000403681.2	hsa-miR-543	3	-0.157	96	-0.157	97
HMGB2	ENST00000296503.5	hsa-miR-543	2	-0.169	97	-0.169	98
HS3ST3A1	ENST00000284110.1	hsa-miR-543	3	-0.287	99	-0.287	99
HS6ST1	ENST00000259241.6	hsa-miR-543	3	-0.116	94	-0.116	96
ID4	ENST00000378700.3	hsa-miR-543	3	-0.227	98	-0.227	99
IL10	ENST00000423557.1	hsa-miR-543	3	-0.19	98	-0.19	98
IL1A	ENST00000263339.3	hsa-miR-543	2	-0.157	96	-0.157	97
ING1	ENST00000333219.7	hsa-miR-543	3	-0.315	99	-0.315	99
ING5	ENST00000313552.6	hsa-miR-543	3	-0.156	96	-0.112	96
INO80C	ENST00000334598.7	hsa-miR-543	2	-0.282	99	-0.282	99
IPO5	ENST00000261574.5	hsa-miR-543	2	-0.163	97	-0.152	97
IQCJ-SCHIP1	ENST00000337808.6	hsa-miR-543	2	-0.123	95	-0.123	96
JDP2	ENST00000435893.2	hsa-miR-543	2	-0.136	95	-0.136	97
KIN	ENST00000379562.4	hsa-miR-543	3	-0.367	99	-0.365	99
KLHL5	ENST00000261425.3	hsa-miR-543	3	-0.218	98	-0.129	96
LEAP2	ENST00000296877.2	hsa-miR-543	2	-0.247	99	-0.238	99
LMO1	ENST00000335790.3	hsa-miR-543	2	-0.303	99	-0.252	99
LMO3	ENST00000354662.1	hsa-miR-543	2	-0.191	98	-0.191	98
LRRC8D	ENST00000337338.5	hsa-miR-543	2	-0.128	95	-0.128	96
LRRC8D	ENST00000337338.5	hsa-miR-543	2	-0.184	97	-0.184	98
MARC2	ENST00000366913.3	hsa-miR-543	3	-0.317	99	-0.317	99
MEIS2	ENST00000397624.3	hsa-miR-543	2	-0.172	97	-0.172	98
METAP1	ENST00000296411.6	hsa-miR-543	3	-0.333	99	-0.27	99
METTL9	ENST00000358154.3	hsa-miR-543	2	-0.185	97	-0.185	98
MIA2	ENST00000280082.3	hsa-miR-543	2	-0.207	98	-0.207	98
MLF1	ENST00000355893.5	hsa-miR-543	2	-0.17	97	-0.17	98
MSL2	ENST00000309993.2	hsa-miR-543	2	-0.124	95	-0.124	96
MTHFD1L	ENST00000367321.3	hsa-miR-543	2	-0.189	98	-0.187	98
NANP	ENST00000304788.3	hsa-miR-543	3	-0.178	97	-0.163	98
NCK2	ENST00000451463.2	hsa-miR-543	2	-0.222	98	-0.217	99
NCL	ENST00000322723.4	hsa-miR-543	2	-0.151	96	-0.149	97
NKRF	ENST00000371527.1	hsa-miR-543	2	-0.16	97	-0.154	97
NMT2	ENST00000378165.4	hsa-miR-543	3	-0.177	97	-0.177	98
NMT2	ENST00000378165.4	hsa-miR-543	2	-0.153	96	-0.14	97
NPTN	ENST00000345330.4	hsa-miR-543	2	-0.143	96	-0.143	97
NUP43	ENST00000367403.3	hsa-miR-543	2	-0.116	94	-0.116	96
PAFAH1B2	ENST00000527958.1	hsa-miR-543	2	-0.142	96	-0.142	97
PAWR	ENST00000328827.4	hsa-miR-543	3	-0.287	99	-0.286	99
PCBP1	ENST00000303577.5	hsa-miR-543	3	-0.364	99	-0.358	99
PDAP1	ENST00000350498.3	hsa-miR-543	2	-0.159	97	-0.159	97
PLA2G4A	ENST00000367466.3	hsa-miR-543	3	-0.239	98	-0.164	98
POC1B-GALNT4	ENST00000547474.1	hsa-miR-543	2	-0.125	95	-0.125	96
PPP2R2C	ENST00000335585.5	hsa-miR-543	2	-0.121	95	-0.121	96
PSPC1	ENST00000338910.4	hsa-miR-543	2	-0.125	95	-0.125	96
PYURF	ENST00000273968.4	hsa-miR-543	2	-0.248	99	-0.248	99
RAB11A	ENST00000569896.1	hsa-miR-543	2	-0.168	97	-0.138	97
RABGEF1	ENST00000284957.5	hsa-miR-543	2	-0.157	96	-0.114	96
RBM47	ENST00000319592.4	hsa-miR-543	3	-0.165	97	-0.165	98
RHOQ	ENST00000238738.4	hsa-miR-543	2	-0.163	97	-0.163	97
RIMBP3C	ENST00000331505.5	hsa-miR-543	3	-0.141	96	-0.141	97
RNF125	ENST00000217740.3	hsa-miR-543	2	-0.122	95	-0.122	96
RNF13	ENST00000392894.3	hsa-miR-543	3	-0.279	99	-0.279	99
RNF2	ENST00000367510.3	hsa-miR-543	3	-0.209	98	-0.164	98
RP11-178L8.4	ENST00000568879.1	hsa-miR-543	1	-0.18	97	-0.132	96
RRAGA	ENST00000380527.1	hsa-miR-543	3	-0.294	99	-0.286	99
RSPO2	ENST00000517939.1	hsa-miR-543	2	-0.138	96	-0.138	97
RTCB	ENST00000451746.2	hsa-miR-543	2	-0.209	98	-0.15	97
RWDD2B	ENST00000493196.1	hsa-miR-543	2	-0.127	95	-0.123	96
SCHIP1	ENST00000445224.2	hsa-miR-543	2	-0.153	96	-0.153	97
SCOC	ENST00000608372.1	hsa-miR-543	2	-0.179	97	-0.179	98
SCP2	ENST00000488965.1	hsa-miR-543	2	-0.263	99	-0.247	99
SDF2L1	ENST00000248958.4	hsa-miR-543	2	-0.316	99	-0.315	99
SERPINI1	ENST00000446050.2	hsa-miR-543	3	-0.355	99	-0.355	99
SH3GLB1	ENST00000370558.4	hsa-miR-543	2	-0.159	97	-0.154	97
SHISA9	ENST00000558583.1	hsa-miR-543	2	-0.113	94	-0.113	96
SIAE	ENST00000263593.3	hsa-miR-543	2	-0.15	96	-0.15	97
SIRT1	ENST00000212015.6	hsa-miR-543	2	-0.141	96	-0.141	97
SIX2	ENST00000303077.6	hsa-miR-543	2	-0.133	95	-0.133	97
SLAIN1	ENST00000418532.1	hsa-miR-543	2	-0.13	95	-0.125	96
SLC25A12	ENST00000422440.2	hsa-miR-543	2	-0.141	96	-0.141	97
SMIM7	ENST00000487416.2	hsa-miR-543	2	-0.223	98	-0.223	99
SOS1	ENST00000426016.1	hsa-miR-543	3	-0.123	95	-0.123	96
STRBP	ENST00000447404.2	hsa-miR-543	3	-0.226	98	-0.226	99
SYNE1	ENST00000367255.5	hsa-miR-543	3	-0.188	98	-0.188	98
TAF13	ENST00000338366.5	hsa-miR-543	3	-0.292	99	-0.286	99
TCERG1	ENST00000296702.5	hsa-miR-543	3	-0.165	97	-0.155	97
TCF7L2	ENST00000369386.1	hsa-miR-543	2	-0.189	98	-0.183	98
TMEM106B	ENST00000396667.3	hsa-miR-543	2	-0.162	97	-0.162	97
TMEM200C	ENST00000581347.2	hsa-miR-543	3	-0.171	97	-0.171	98
TMEM203	ENST00000343666.5	hsa-miR-543	2	-0.285	99	-0.2	98
TNFSF11	ENST00000405262.2	hsa-miR-543	3	-0.362	99	-0.362	99
TOX	ENST00000361421.1	hsa-miR-543	2	-0.146	96	-0.146	97
TRIM39	ENST00000396551.3	hsa-miR-543	3	-0.165	97	-0.165	98
TSPAN7	ENST00000378482.2	hsa-miR-543	3	-0.257	99	-0.257	99
TUSC3	ENST00000503731.1	hsa-miR-543	2	-0.225	98	-0.225	99
TWIST1	ENST00000242261.5	hsa-miR-543	2	-0.182	97	-0.182	98
UBE2M	ENST00000253023.3	hsa-miR-543	3	-0.267	99	-0.267	99
UBE2W	ENST00000517608.1	hsa-miR-543	3	-0.122	95	-0.122	96
UBXN2B	ENST00000399598.2	hsa-miR-543	2	-0.121	95	-0.121	96
WDR75	ENST00000314761.4	hsa-miR-543	1	-0.142	96	-0.142	97
WRNIP1	ENST00000380769.4	hsa-miR-543	1	-0.137	96	-0.137	97
ZBTB43	ENST00000449886.1	hsa-miR-543	3	-0.152	96	-0.152	97
ZCCHC14	ENST00000268616.4	hsa-miR-543	2	-0.127	95	-0.115	96
ZDHHC3	ENST00000296127.3	hsa-miR-543	2	-0.115	94	-0.115	96
ZFAND5	ENST00000237937.3	hsa-miR-543	2	-0.126	95	-0.123	96
ZFAND5	ENST00000237937.3	hsa-miR-543	2	-0.15	96	-0.146	97
ZIC2	ENST00000376335.3	hsa-miR-543	2	-0.145	96	-0.145	97
ZSWIM1	ENST00000372523.1	hsa-miR-543	2	-0.132	95	-0.121	96
